# Supplementary material for: Nucleus-dependent sarcomere assembly is mediated by the LINC complex
Source: PubMed Central journal article supplement — Mol Biol Cell. 2016 Aug 1;27(15):2351–9. doi: 10.1091/mbc.E16-01-0021 (PMC4966977; doi:10.1091/mbc.e16-01-0021), 2016-08-01
Supplement: supp_E16-01-0021v1_CombinedSupMats.pdf [file supp_E16-01-0021v1_CombinedSupMats.pdf]

# Supplemental Materials

*Molecular Biology of the Cell*

Auld and Folker et al.
